# Supplementary material
Source: PubMed Central journal article supplement (PMC5772242)
Supplement: AEM.01790-17_zam003188280s1.pdf [file AEM.01790-17_zam003188280s1.pdf]

598 **APPENDIXES:**599 **A-1: Resistance and intermediate resistance profiles of *V. vulnificus* isolates**

| Isolates No | Resistance Profile                           | Intermediate Profile      | VcgC     |
|-------------|----------------------------------------------|---------------------------|----------|
| VV 1 D0     | Aug2-Amp-Fot-Fox-Taz-Axo-Cep-Chl-Dox-Imi-Tet | Fep-Mero                  |          |
| VV 2 D0     | Aug2-Fox-Cep-Dox-Tet                         | Chl                       |          |
| VV 3 D0     | Fox-Cep-Dox-Tet                              | Chl                       |          |
| VV 4 D0     | Fep-Fot-Taz-Axo-Cep-Sxt                      | Amp-Fox                   |          |
| VV 5 D0     | Fot-Fox-Cep-Tet                              | Chl                       |          |
| VV 6 D0     | Cep                                          | Fox                       |          |
| VV 8 S1     | Cep-Tet                                      | Fox                       |          |
| VV 9 S1     | Cep                                          | Fox                       |          |
| VV 10 S1    | Fox                                          | Taz, Cep                  |          |
| VV 11 S1    | Cep                                          | -----                     |          |
| VV 12 S1    | Amp-Cep-Imi                                  | Aug2-Fox-Tet              |          |
| VV 13 S1    | Amp-Cep-Imi                                  | Aug2-Fox-Dox              |          |
| VV 14 S2    | Aug2-Cep                                     | -----                     |          |
| VV 15 S2    | Cep                                          | 2-Aug                     |          |
| VV 16 S2    | Aug2-Cep                                     | -----                     |          |
| VV 20 S2    | Cep                                          | Fox                       |          |
| VV 21 S2    | Aug2-Amp-Cep-Imi                             | Fox-Dox                   |          |
| VV 22 S2    | Cep                                          | Fox                       |          |
| VV 23 S1    | Taz-Axo-Cep                                  | Chl-Tet                   |          |
| VV 24 S1    | Axo-Cep                                      | Aug2-Fep-Fox-Dox-Mero-Tet |          |
| VV 25 S1    | Cep                                          | Fox                       |          |
| VV 26 S1    | Fox-Taz-Axo-Cep                              | -----                     |          |
| VV 27 S1    | Fot-Fox-Taz-Axo-Cep                          | -----                     |          |
| VV 28 S1    | Cep                                          | -----                     | Positive |
| VV 29 D0    | Fox-cep                                      | Axo                       |          |
| VV 30 D0    | Cep                                          | Fep-Fot-Mero              |          |
| VV 33 D0    | Imi                                          | -----                     |          |
| VV 34 S1    | Cep                                          | Fox-Axo                   |          |
| VV 35 S1    | Cep                                          | -----                     |          |
| VV 36 S1    | Taz-Axo                                      | -----                     |          |
| VV 37 S1    | -----                                        | Fox                       |          |
| VV 40 S1    | -----                                        | Taz                       | Positive |
| VV 41 S2    | Aug2-Amp-Cep-Dox-Tet                         | Fox                       |          |
| VV 42 S2    | -----                                        | Fox                       |          |
| VV 44 S1    | -----                                        | Ami-Fox                   |          |
| VV 46 S1    | Aug2-Amp-Cep-Dox-Tet                         | A/S2-Fox-Taz-Imi          |          |
| VV 47 S1    | Aug2-Amp-Cep-Dox-Tet                         | Imi                       | Positive |
| VV 48 S2    | Aug2-Amp-Cep-Dox-Tet                         | Imi-P/T4                  | Positive |

|          |                               |              |          |
|----------|-------------------------------|--------------|----------|
| VV 49 S2 | Aug2-Amp-Taz-Cep-Dox-Imi      | Fox-Chl-Tet  |          |
| VV 50 S2 | Cep-Dox-Tet                   | Aug2-Fox-Imi |          |
| VV 51 S1 | Amp-Cep-Dox                   | Imi          |          |
| VV 52 S1 | -----                         | Ami          |          |
| VV 53 S1 | -----                         | Ami-Fox      |          |
| VV 54 S1 | -----                         | Ami          |          |
| VV 55 S1 | Aug2-Amp-Cep-Tet              | Taz-Axo-Dox  |          |
| VV 56 S1 | Tet                           | Taz-Axo-Chl  |          |
| VV 57 S1 | Fox                           | -----        |          |
| VV 58 S1 | -----                         | Fox-Taz      |          |
| VV 59 S1 | -----                         | Ami-Fox      |          |
| VV 62 S2 | Aug2-Amp-Cep-Dox-Imi-Tet      | A/S2-Fox     | Positive |
| VV 63 S2 | Aug2-Amp-A/S2-Cep-Dox-Imi-Tet | Fox          | Positive |
| VV 64 S2 | Aug2-Amp-A/S2-Cep-Imi-Tet     | Fox          | Positive |

D0: Harvesting day

600 S1: Moderate salinity site

601 S2: High salinity site

602 VV: *V. vulnificus*

603 *vcgC*: virulence correlating gene type C,

604 (AMI) Amicacin, (AUG2) Amoxicillin/ Clavulactic acid, (AMP) Ampicillin, (A/S2)

605 Ampicillin/Sulbactam, (FEP) Cefepime, (FOT) Cefotaxime, (FOX) Cefoxitin, (TAZ)

606 Ceftazidimide, (AXO) Ceftriaxone, (CEP) Cephalothin, (CHL) Chloramphenicol, (DOX)

607 Doxycycline, (IMI) Imipenem, (MERO) Meropenem, (PIP) Piperacillin, (TET) Tetracycline,

608 (P/T4) Piperacillin/Tazobactam

609

610 **A-2: Resistance and intermediate resistance profiles of *V. parahaemolyticus* isolates**

| <b>Sample No</b> | <b>Resistance profile</b> | <b>Intermediate resistance profile</b> | <b>tdh/trh</b> |
|------------------|---------------------------|----------------------------------------|----------------|
| VP 1 D0          | -----                     | Cep                                    |                |
| VP 2 D0          | -----                     | Cep                                    |                |
| VP 3 D0          | -----                     | Cep                                    |                |
| VP 4 D0          | -----                     | Cep                                    |                |
| VP 5 D0          | -----                     | Cep                                    |                |
| VP 9 S1          | -----                     | Cep                                    |                |
| VP 10 S1         | -----                     | Cep                                    |                |
| VP 11 S1         | -----                     | Cep                                    |                |
| VP 13 S1         | -----                     | Cep                                    |                |
| VP 15 S1         | -----                     | Cep                                    |                |
| VP 16 S1         | -----                     | Imi                                    |                |
| VP 17 S1         | -----                     | Imi                                    |                |
| VP 18 S1         | -----                     | Dox                                    |                |
| VP 20 S2         | -----                     | Fox-Cep                                |                |
| VP 21 S2         | -----                     | Fox-Cep                                |                |
| VP 22 S2         | -----                     | Fox-Cep                                |                |
| VP 23 S2         | -----                     | Cep                                    |                |
| VP 24 S2         | -----                     | Cep                                    |                |
| VP 25 S2         | -----                     | Fox-Cep                                |                |
| VP 28 S1         | -----                     | Cep                                    |                |
| VP 30 S1         | -----                     | Cep                                    |                |
| VP 31 S1         | -----                     | Fox-Cep                                |                |
| VP 33 S1         | -----                     | Cep                                    |                |
| VP 35 S1         | -----                     | Cep-Imi                                |                |
| VP 36 S2         | Cep                       | -----                                  |                |
| VP 37 S2         | -----                     | Fox                                    |                |
| VP 39 S2         | Fox                       | Cep                                    |                |
| VP 41 S2         | -----                     | Fox-Axo-Cep                            |                |
| VP 42 S2         | Fot                       | -----                                  |                |
| VP 43 S2         | -----                     | Fox                                    |                |
| VP 44 S1         | -----                     | Fox-Cep                                |                |
| VP 45 S1         | -----                     | Fox                                    |                |
| VP 46 S1         | -----                     | Fox-Cep                                |                |
| VP 49 S1         | -----                     | Fox-Axo                                |                |
| VP 54 S2         | -----                     | Cep                                    |                |
| VP 55 S2         | -----                     | Chl                                    |                |
| VP 58 S2         | -----                     | Fox                                    |                |

|          |                 |                  |      |
|----------|-----------------|------------------|------|
| VP 60 D0 | Fox-Taz-Axo-Cep | Fep              |      |
| VP 62 D0 | -----           | Fox-Cep          |      |
| VP 64 D0 | -----           | Fox-Cep          |      |
| VP 65 D0 | Amp-Fox-Taz     | Cep              |      |
| VP 66 D0 | Fox-Taz-Axo-Cep | Ami-Fep          |      |
| VP 67 D0 | Taz             | -----            |      |
| VP 68 S1 | -----           | Fox-Axo          |      |
| VP 69 S1 | -----           | Fox-Taz-Cep      |      |
| VP 70 S1 | Axo             | Fox-Cep          |      |
| VP 71 S1 | Fot-Fox-Taz-Cep | -----            |      |
| VP 72 S2 | -----           | Fox-Taz-Cep      |      |
| VP 73 S2 | Axo             | Fox-Cep          |      |
| VP 74 S2 | Fot-Fox-Taz-Cep | -----            |      |
| VP 75 S2 | Fox             | Amp-Fep          |      |
| VP 76 S2 | Fep-Fox-Taz-Cep | Mero             |      |
| VP 77 S2 | Ami-Fox-Taz-Cep | -----            |      |
| VP 78 S2 | -----           | Cep              |      |
| VP 79 S2 | Aug2-Fox        | -----            |      |
| VP 80 S1 | Cep-Dox-Tet     | Amp              |      |
| VP 81 S1 | -----           | Cep              |      |
| VP 82 S1 | Fox-Axo         | Ami-Taz-Cep-Mero |      |
| VP 83 S1 | Fox             | Axo              |      |
| VP 84 S1 | -----           | Fox-Cep          |      |
| VP 85 S2 | -----           | Amp-Fep-Cep      |      |
| VP 86 S2 | -----           | Amp-Fox-Cep      |      |
| VP 87 S2 | Amp             | Fox-Cep-Pip      |      |
| VP 88 S2 | Cep             | -----            |      |
| VP 89 S2 | Cep             | -----            |      |
| VP 90 S1 | -----           | Cep              | tdh+ |
| VP 91 S2 | Pip             | Ami-Amp-Taz-Cep  | trh+ |
| VP 92 S1 | Amp             | Ami-Cep          | trh+ |
| VP 93 D0 | -----           | Cep              | tdh+ |

611 D0: Harvesting day

612 S1: Moderate salinity site

613 S2: High salinity site

614 VP: *V. parahaemolyticus*

615 *tdh*: Thermo stable direct hemolysin,

616 *trh*: TDH-related hemolysin

617 (AMI) Amicacin, (AUG2) Amoxicillin/ Clavulactic acid, (AMP) Ampicillin, (FEP) Cefepime,  
618 (FOT) Cefotaxime, (FOX) Cefoxitin, (TAZ) Ceftazidimide, (AXO) Ceftriaxone, (CEP)  
619 Cephalothin, (CHL) Chloramphenicol, (MERO) Meropenem, (PIP) Piperacillin  
620
